# Supplementary material for: Two Prp19-Like U-Box Proteins in the MOS4-Associated Complex Play Redundant Roles in Plant Innate Immunity
Source: PubMed Central journal article supplement (PMC2709443; doi:10.1371/journal.ppat.1000526), 2009-07-24
Supplement: ppat.1000526.s002.pdf [file ppat.1000526.s002.pdf]

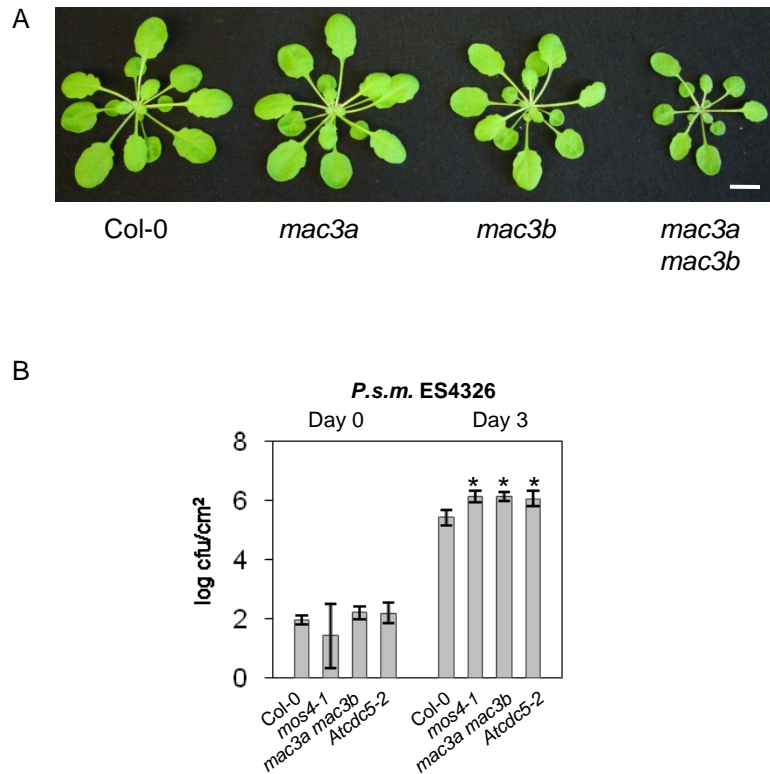

**Figure S2. Morphology of the *mac3a mac3b* double mutant and enhanced susceptibility to *P.s.m.* ES4326.**

(A) Morphology of Col-0, *mac3a*, *mac3b*, and *mac3a mac3b* plants. Soil-grown plants were photographed 4 weeks after planting. Size bar represents 1 cm. (B) Growth of *P.s.m.* ES4326 at 0 and 3 days post-inoculation. Values represent an average of four replicates  $\pm$  SD. This trend is apparent in several repeated experiments. These plants were grown in 16h light and low humidity, in a cooler growth chamber than is usually used for pathogen infections. An unpaired Student's *t*-test was used to analyze the statistical significance of bacterial growth compared to Col-0. Asterisks indicate  $P < 0.02$ .
