# Supplementary material for: Two Prp19-Like U-Box Proteins in the MOS4-Associated Complex Play Redundant Roles in Plant Innate Immunity
Source: PubMed Central journal article supplement (PMC2709443; doi:10.1371/journal.ppat.1000526), 2009-07-24
Supplement: ppat.1000526.s003.pdf [file ppat.1000526.s003.pdf]

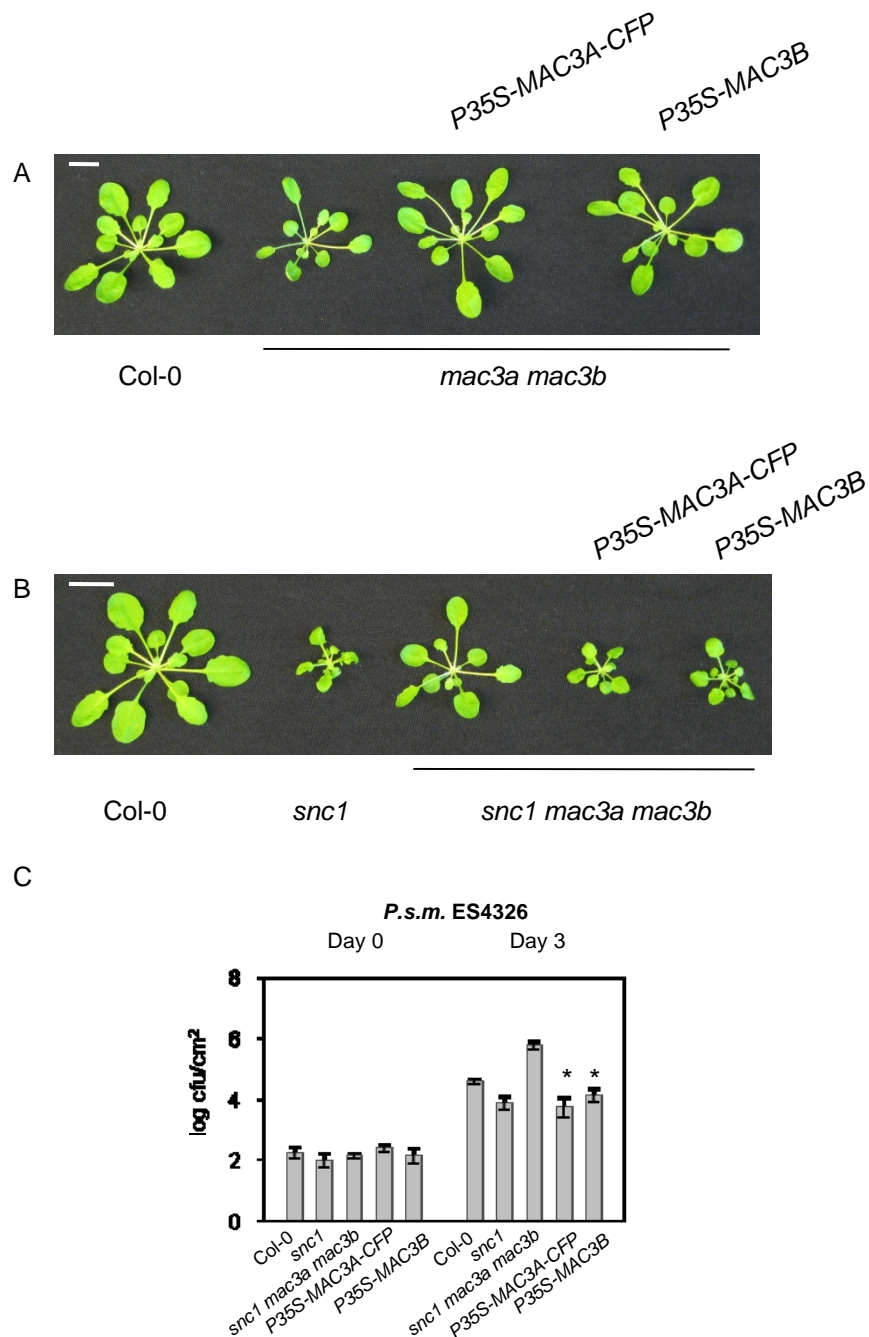

**Figure S3. Transgenic complementation of *mac3a mac3b* and *snc1 mac3a mac3b* by *MAC3A* and *MAC3B*.**

(A) Morphology of Col-0, *mac3a mac3b*, and *mac3a mac3b* plants expressing *P35S-MAC3A-CFP* or *P35S-MAC3B*. Soil-grown plants were photographed 4 weeks after planting. Size bar represents 1 cm. (B) Morphology of Col-0, *snc1*, *snc1 mac3a mac3b*, and *snc1 mac3a mac3b* plants expressing *P35S-MAC3A-CFP* or *P35S-MAC3B*. Soil-grown plants were photographed 4 weeks after planting. Bar represents 1 cm. (C) Growth of *P.s.m. ES4326* at 0 and 3 days post-inoculation. Values represent an average of four replicates  $\pm$  SD. Experiment was repeated twice with similar results. P values were calculated using an unpaired Student's *t*-test comparing bacterial growth in *snc1 mac3a mac3b* with the transgenic lines. Asterisks indicate  $P < 0.001$ .
