# Supplementary material for: Two Prp19-Like U-Box Proteins in the MOS4-Associated Complex Play Redundant Roles in Plant Innate Immunity
Source: PubMed Central journal article supplement (PMC2709443; doi:10.1371/journal.ppat.1000526), 2009-07-24
Supplement: ppat.1000526.s004.pdf [file ppat.1000526.s004.pdf]

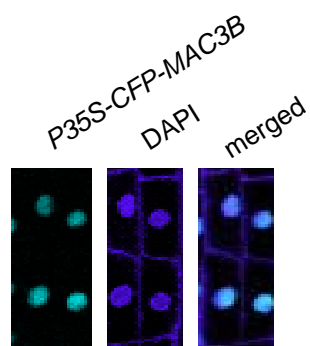

**Figure S4. Sub-cellular localization of MAC3B.**

Confocal microscopy was used to examine the localization of *P35S-CFP-MAC3B* in complementing transgenic *mac3a mac3b* plants. Root cells are shown. DAPI was used as a nuclear marker.
