# Supplementary material for: Two Prp19-Like U-Box Proteins in the MOS4-Associated Complex Play Redundant Roles in Plant Innate Immunity
Source: PubMed Central journal article supplement (PMC2709443; doi:10.1371/journal.ppat.1000526), 2009-07-24
Supplement: ppat.1000526.s005.pdf [file ppat.1000526.s005.pdf]

```

MAC3B*          D R N L R I F G L P G D E K A N V D D D S A Q D S - Stop 525
TAIR            GACCGTAACCTACGGATATTTGGTCTTCCTGGTGATGAAAAAGCCAACGTCGATGATGACTCTGCGCAAGACTCGTGA-
MAC3B*          - - - - -
TAIR            CAATCCGTAAAAAAGCTCAGACAGAACATTCCAAATGTCCATCTCCAGTGTATCTCGCTCAAATTTCTCAAGTTCTGTTGT
MAC3B*          - - - - -
TAIR            ATCTTACAGTATTTGCAGCAATGGGGGAGAATTTCATAG
                I L Q Y L Q Q W G R I S - 565

```

**Figure S5. MAC3B cDNA sequence analysis.**

A comparison of *MAC3B* cDNA sequences from this study (marked with an asterisk) and from TAIR8. The error in the annotated sequence is shaded grey, as is the corrected stop codon.
