# Supplementary material for: Two Prp19-Like U-Box Proteins in the MOS4-Associated Complex Play Redundant Roles in Plant Innate Immunity
Source: PubMed Central journal article supplement (PMC2709443; doi:10.1371/journal.ppat.1000526), 2009-07-24
Supplement: ppat.1000526.s006.pdf [file ppat.1000526.s006.pdf]

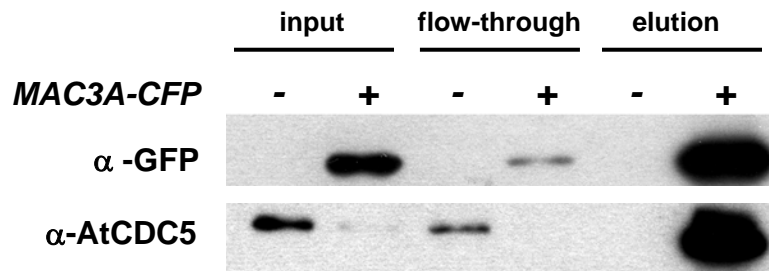

**Figure S6. *MAC3A-CFP* associates with *AtCDC5* in *planta*.**

Total nuclear extracts were isolated from a complementing *mac3a mac3b* transgenic line expressing *P35S-MAC3A-CFP* (+) and Col-0 (-). *MAC3A-CFP* was immunoprecipitated using anti-GFP microbeads. *MAC3A-CFP* and *AtCDC5* were detected in the eluted fractions by Western blot analysis using antibodies against GFP or *AtCDC5*. In this experiment, less input was observed in the *MAC3A-CFP* sample due to poor recovery of nuclei. Since less protein was present in the IP experiment, reduction in *MAC3A-CFP* and *AtCDC5* in the flow-through is observed.
