# Supplementary material for: Two Prp19-Like U-Box Proteins in the MOS4-Associated Complex Play Redundant Roles in Plant Innate Immunity
Source: PLOS journal article supplement (doi:10.1371/journal.ppat.1000526), 2009-07-23
Supplement: S7 (10.1371/journal.ppat.1000526.s007) [file journal.ppat.1000526.s007]

Table S1. Predicted sub-cellular localization of MAC components and details from mass spectrometry analysis.

|                                             |                                                              | Predicted subcellular localization (TAIR version 8) |                                |                   | Mass Spectrometry Details |                |                                               |                       |
|---------------------------------------------|--------------------------------------------------------------|-----------------------------------------------------|--------------------------------|-------------------|---------------------------|----------------|-----------------------------------------------|-----------------------|
| At number                                   | Protein description                                          | Localization                                        | Experimental evidence          | Reference (below) | GI                        | Mascot score** | Number of unique peptide matches (score > 20) | Sequence Coverage (%) |
| <b>NTC Core Proteins*</b>                   |                                                              |                                                     |                                |                   |                           |                |                                               |                       |
| AT1G09770                                   | AtCDC5/MAC1; R2-R3 Myb transcription factor                  | Nucleus                                             | GFP-fusion, stably transformed | 1                 | 1747310                   | 1381           | 25                                            | 35                    |
| AT1G04510                                   | MAC3A; PUB; WD-40 repeat family                              | Nucleus                                             | CFP-fusion, stably transformed | this work         | 18390401                  | 816            | 12                                            | 29                    |
| AT2G33340                                   | MAC3B; PUB; WD-40 repeat family                              | Nucleus                                             | CFP-fusion, stably transformed | this work         | 2459417                   | 991            | 18                                            | 37                    |
| AT3G18165                                   | MOS4; protein-protein interactions                           | Nucleus                                             | GFP-fusion, stably transformed | 2                 | 9294072                   | 324            | 7                                             | 20                    |
| AT4G15900                                   | PRL1/MAC2; WD-40 repeat family                               | Nucleus                                             | GFP-fusion, stably transformed | 2                 | 15234752                  | 719            | 12                                            | 32                    |
| <b>Other NTC Associated Proteins*</b>       |                                                              |                                                     |                                |                   |                           |                |                                               |                       |
| AT1G07360                                   | zinc finger (CCCH-type) family protein; RNA binding          | Unknown                                             | N/A                            | N/A               | 15450878                  | 314            | 5                                             | 11                    |
| AT1G77180                                   | chromatin protein family                                     | Nucleolus, nucleus                                  | organelle proteome datasets    | 3,4               | 18411393                  | 937            | 20                                            | 34                    |
| AT2G38770                                   | EMB2765; helicase                                            | Chloroplast, plasma membrane                        | organelle proteome datasets    | 5,6               | 3785995                   | 1650           | 33                                            | 26                    |
| AT3G18790                                   | similar to two coiled coil domains of eukaryotic ori         | Chloroplast                                         | organelle proteome datasets    | 5                 | 15230193                  | 289            | 7                                             | 28                    |
| AT5G28740                                   | transcription-coupled DNA repair-related; RNA processing     | Unknown                                             | N/A                            | N/A               | 15241911                  | 973            | 23                                            | 25                    |
| AT5G41770                                   | cell cycle control crooked neck protein-like; RNA processing | Unknown                                             | N/A                            | N/A               | 25083215                  | 1428           | 31                                            | 40                    |
| <b>Predicted splicing-related proteins*</b> |                                                              |                                                     |                                |                   |                           |                |                                               |                       |
| AT1G06220                                   | CLO/GFA1/MEE5; translation elongation; nucleic acid binding  | Cell wall, plasma membrane                          | organelle proteome datasets    | 7,8               | 15221423                  | 2389           | 43                                            | 51                    |
| AT1G10580                                   | WD-40 repeat family; nucleotide binding                      | Unknown                                             | N/A                            | N/A               | 5091552                   | 1067           | 21                                            | 33                    |
| AT1G15200                                   | protein-protein interaction regulator family                 | Unknown                                             | N/A                            | N/A               | 18394209                  | 648            | 15                                            | 34                    |
| AT1G20960                                   | EMB1507; DEAD-box helicase                                   | membrane, nucleolus                                 | organelle proteome datasets    | 4,9               | 15218086                  | 4805           | 94                                            | 49                    |
| AT1G32490                                   | EMB2733/ESP3; DEAD-box like helicase                         | endomembrane                                        | TargetP1.1                     | N/A               | 8920625                   | 384            | 11                                            | 13                    |
| AT1G80070                                   | SUS2/EMB177; embryogenesis                                   | chloroplast, membrane, nucleus                      | organelle proteome, Interpro   | 5,8               | 5902365                   | 4973           | 105                                           | 48                    |
| AT2G43770                                   | WD-40 repeat family; nucleotide binding                      | Unknown                                             | N/A                            | N/A               | 15224356                  | 630            | 10                                            | 29                    |
| AT5G64270                                   | putative splicing factor similar to RCN1; PP2A regulator     | chloroplast                                         | organelle proteome datasets    | 5                 | 15237657                  | 440            | 10                                            | 7                     |
| <b>Unrelated proteins*</b>                  |                                                              |                                                     |                                |                   |                           |                |                                               |                       |
| AT3G15730                                   | PLDα1; hormone response                                      | chloroplast, membrane                               | organelle proteome datasets    | 5,8,10            | 15232671                  | 1318           | 26                                            | 42                    |
| AT3G20820                                   | LRR family; defense response                                 | cell wall, membrane, chloroplast, apoplast          | organelle proteome datasets    | 5,6,11,12         | 15232373                  | 736            | 11                                            | 37                    |
| AT3G60190                                   | ADL1E/DRP1E/EDR3; GTPase; defense response                   | plasma membrane, vacuole                            | organelle proteome datasets    | 6,13,14           | 18411520                  | 609            | 13                                            | 26                    |
| AT4G19410                                   | putative pectin acetyltransferase; carboxylesterase activity | cell wall, membrane                                 | organelle proteome datasets    | 7,8,14            | 18415308                  | 315            | 6                                             | 16                    |
| AT5G42080                                   | ADL1A/DRP1A/RSW9; GTPase                                     | plasma membrane, vacuole                            | organelle proteome datasets    | 6,13,14           | 30693985                  | 1290           | 27                                            | 41                    |

\* As organized in Wang BB, Brendel V (2004) The ASRG database: identification and survey of Arabidopsis thaliana genes involved in pre-mRNA splicing. Genome Biol 5: R102.

\*\* Mascot calculates protein score as  $-10 \cdot \log_{10}(P)$ , where P is the absolute probability that the match is a random event.

MAC proteins are organized as in Table 1, based on protein homology to NTC proteins in yeast and human. Predicted sub-cellular localization data is inferred mostly from organelle proteomics datasets, with the exception of the MAC/NTC core proteins, where localization has been shown with complementing transgenic lines expressing fluorescent protein translational fusions. Although the predicted sub-cellular localization for most MAC proteins is ambiguous, their predicted functions in spliceosome-mediated RNA processing suggest that they are nuclear. Mass spectrometry details including the number of unique peptides and sequence coverage, as well as Mascot scores, for all identified proteins, are included in the columns to the right. The 2007 version of the *Arabidopsis* genome was used for protein identification.

#### References

- Lin Z, Yin K, Wang X, Liu M, Chen Z, et al. (2007) Virus induced gene silencing of AtCDC5 results in accelerated cell death in Arabidopsis leaves. Plant Physiol Biochem 45: 87-94.
- Palma K, Zhao Q, Cheng YT, Bi D, Monaghan J, et al. (2007) Regulation of plant innate immunity by three proteins in a complex conserved across the plant and animal kingdoms. Genes Dev 21: 1484-1493.
- Pendle AF, Clark GP, Boon R, Lewandowska D, Lam Y, et al. (2004) Proteomic Analysis of the Arabidopsis Nucleolus Suggests Novel Nucleolar Functions. Mol Biol Cell 16: 260-269.
- Bae MS, Cho EJ, Choi EY, Park OK. (2003) Analysis of the Arabidopsis nuclear proteome and its response to cold stress. Plant J 36: 652-63.
- Kleffmann T, Russenberger D, von Zychlinski A, Christopher W, Sjolander K, et al. (2004) The Arabidopsis thaliana chloroplast proteome reveals pathway abundance and novel protein functions. Curr Biol 14: 354-62.
- Benschop JJ, Mohammed S, O'Flaherty M, Heck AJR, Slijper M, et al. (2007) Quantitative phospho-proteomics of early elicitor signalling in Arabidopsis. Mol Cell Proteomics 6: 1198-1214.
- Bayer EM, Bottrill AR, Walshaw J, Vigouroux M, Naldrett M, et al. (2005) Arabidopsis cell wall proteome defined using multidimensional protein identification technology. Proteomics 6: 301-11.
- Mitra S, Gantt J, Ruby J, Clouse S, Goshe M. (2007) Membrane Proteomic Analysis of Arabidopsis thaliana Using Alternative Solubilization Techniques. J Proteome Res 6: 1933-1950.
- Zybailov B, Rutschow H, Friso G, Rudella A, Emanuelsson O, et al. (2008) Sorting signals, N-terminal modifications and abundance of the chloroplast proteome. PLoS ONE 3: e1994.
- Boudart G, Jamet E, Rossignol M, Lafitte C, Borderies G, et al. (2005) Cell wall proteins in apoplastic fluids of Arabidopsis thaliana rosettes: identification by mass spectrometry and bioinformatics. Proteomics 5: 212-221.
- Bindschedler LV, Palmblad M, Cramer R. (2008) Hydroponic isotope labelling of entire plants (HILEP) for quantitative plant proteomics; an oxidative stress case study. Phytochemistry 69: 1962-72.
- Carter C, Pan S, Zouhar J, Avila EL, Girke T, et al. (2004) The vegetative vacuole proteome of Arabidopsis thaliana reveals predicted and unexpected proteins. Plant Cell 16: 3285-3303.
- Jaquinod M, Villiers F, Kieffer-Jaquinod S, Hugouvieux V, Bruley C, et al. (2006) A proteomic dissection of Arabidopsis thaliana vacuoles isolated from cell culture. Mol Cell Proteomics 6: 394-412.
- Borderies G, Jamet E, Lafitte C, Rossignol M, Jauneau A, et al. (2003) Proteomics of loosely bound cell wall proteins of Arabidopsis thaliana cell suspension cultures: a critical analysis. Electrophoresis 24: 3421-32.
